# Supplementary material for: Physical Activity Prevents Cartilage Degradation: A Metabolomics Study Pinpoints the Involvement of Vitamin B6
Source: PubMed Central journal article supplement (PMC6912200; doi:10.3390/cells8111374), 2019-11-01
Supplement: cells-08-01374-s001.pdf [file cells-08-01374-s001.pdf]

Supplementary Figure 1

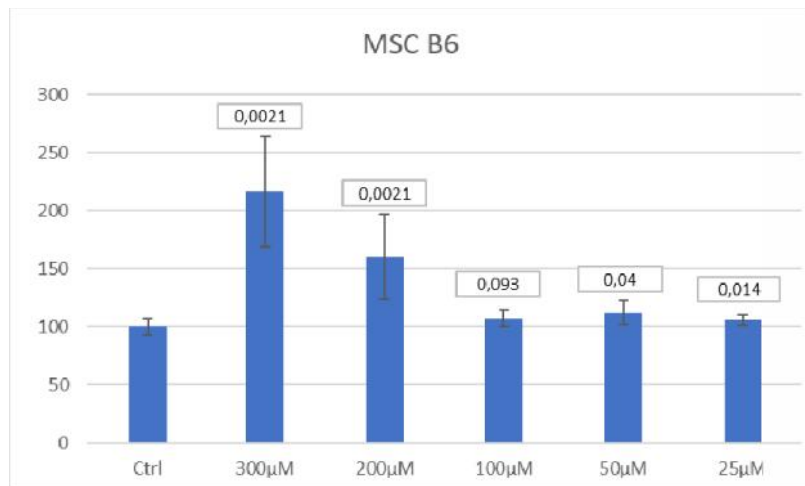

Figure 1A: XTT analysis of vitamin B6 concentration toxicity in MSC model. . P-values calculated using a Wilcox non parametric test are reported above each concentration obtained from the comparison versus the control.

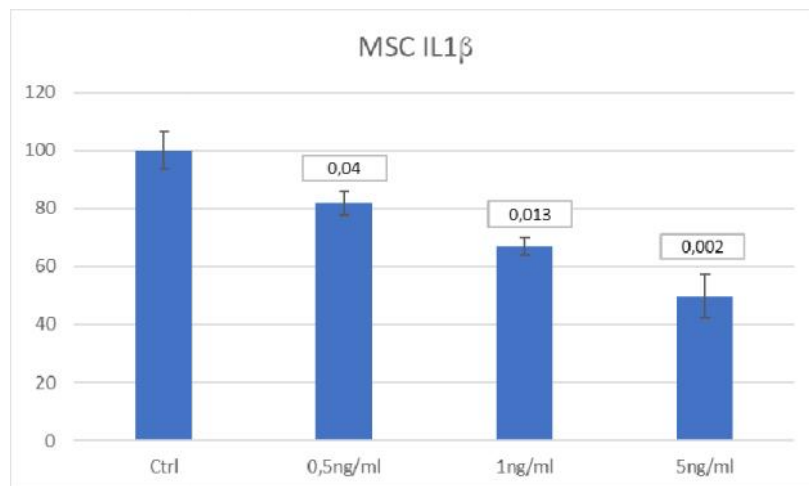

Figure 1B: XTT analysis of IL1 $\beta$  concentration toxicity in MSC model. P-values calculated using a Wilcox non parametric test are reported above each concentration obtained from the comparison versus the control.

Supplementary Figure 2

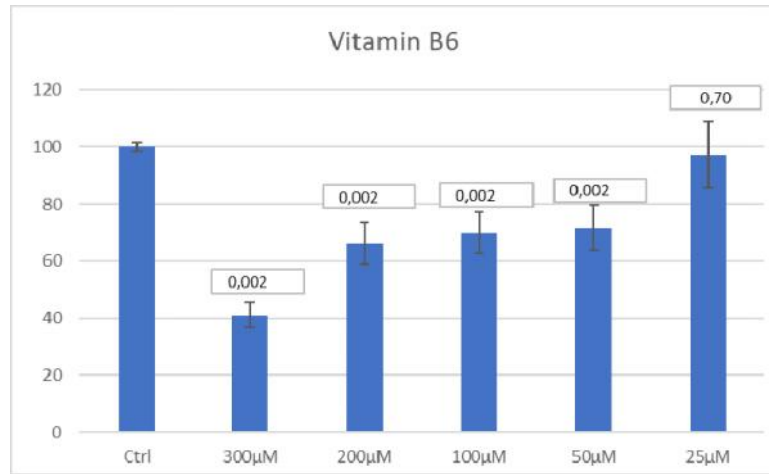

Figure 2A: XTT analysis of vitamin B6 concentration toxicity in chondrosarcoma model. P-values calculated using a Wilcox non parametric test are reported above each concentration obtained from the comparison versus the control.

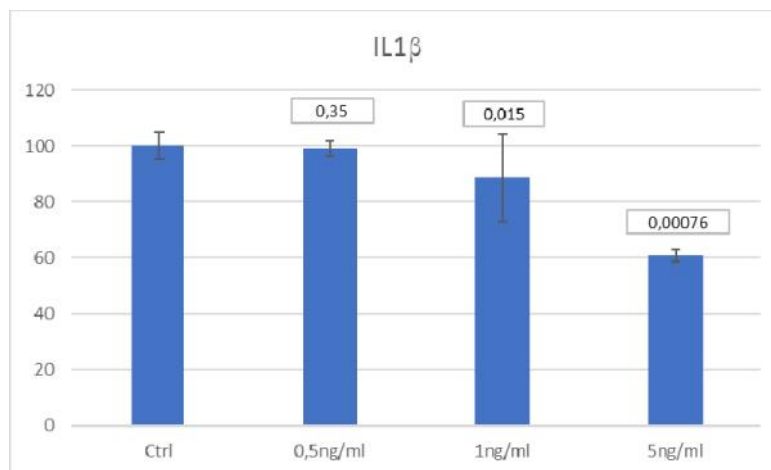

Figure 2B: XTT analysis of IL1 $\beta$  concentration toxicity in chondrosarcoma model. P-values calculated using a Wilcox non parametric test are reported above each concentration obtained from the comparison versus the control.

Supplementary Table 1: t-test analysis of modulated metabolites PRE and POST HM. In teable are reported only the 100 modulated features, among 726 identified and reported in the cloud plot.

| <b>Name</b> | <b>log2fold</b> | <b>pvalue</b> | <b>qvalue</b> | <b>updown</b> |
|-------------|-----------------|---------------|---------------|---------------|
| M170T2_3    | 4,1             | 0,0000000104  | 0,0000545148  | UP            |
| M231T3      | 5,4             | 0,0000072958  | 0,0131809142  | UP            |
| M189T_4     | -1,56309        | 0,0000076800  | 0,0134116400  | DOWN          |
| M191T2_6    | 5,93            | 0,0000192660  | 0,0247122863  | UP            |
| M365T2_7    | 2,72            | 0,0000397850  | 0,0347111485  | UP            |
| M611T14_1   | 7,16            | 0,0000458276  | 0,0365416072  | UP            |
| M423T2_2    | 1,56            | 0,0000662191  | 0,0409162895  | UP            |
| M523T3_2    | -4,94           | 0,0000815126  | 0,0430915493  | DOWN          |
| M423T2_4    | 60,4            | 0,0000837270  | 0,0433554930  | UP            |
| M709T3_1    | -1,79           | 0,0000930718  | 0,0443597501  | DOWN          |
| M834T17     | 0,393053        | 0,0002351295  | 0,0517402574  | UP            |
| M697T2_1    | 2,259001        | 0,0002415243  | 0,0521119148  | UP            |
| M427T14_1   | -0,32846        | 0,0002512425  | 0,0526497899  | DOWN          |
| M344T13     | -0,37332        | 0,0002767439  | 0,0551468178  | DOWN          |
| M469T14_1   | -0,40886        | 0,0002907601  | 0,0564175936  | DOWN          |
| M415T10     | 2,483044        | 0,0003137989  | 0,0587133609  | UP            |
| M123T2_2    | 1,137847        | 0,0003388809  | 0,0612198904  | UP            |
| M708T2_2    | 2,296505        | 0,0004203727  | 0,0683066459  | UP            |
| M605T11     | 1,739517        | 0,0004248069  | 0,0686516002  | UP            |
| M475T14_2   | 3,356004        | 0,0004681274  | 0,0718341763  | UP            |
| M150T3      | 2,878599        | 0,0005016288  | 0,0740833775  | UP            |
| M207T3_2    | -1,9964         | 0,0005341234  | 0,0761092129  | DOWN          |
| M407T12_1   | 2,497957        | 0,0005613984  | 0,0777028373  | UP            |
| M698T2      | 2,224737        | 0,0005893604  | 0,0792444685  | UP            |
| M835T17     | 0,332035        | 0,0006009513  | 0,0798580097  | UP            |
| M370T12     | 1,00735         | 0,0006066282  | 0,0801533030  | UP            |
| M232T11_1   | 2,483794        | 0,0006236753  | 0,0810201526  | UP            |
| M230T2_1    | 2,530679        | 0,0006260577  | 0,0811389808  | UP            |
| M396T11_1   | 2,775774        | 0,0006405642  | 0,0818506784  | UP            |
| M672T17     | 0,311373        | 0,0008000502  | 0,0907006402  | UP            |
| M1060T17    | 0,407086        | 0,0008049561  | 0,0909413331  | UP            |
| M424T2_2    | 1,959054        | 0,0008294422  | 0,0921182185  | UP            |
| M191T2_4    | 1,122368        | 0,0008442649  | 0,0928114452  | UP            |
| M155T2_4    | -3,50512        | 0,0009228133  | 0,0962618213  | DOWN          |

|           |          |              |              |      |
|-----------|----------|--------------|--------------|------|
| M203T3    | 1,872114 | 0,0009563817 | 0,0976311066 | UP   |
| M506T11_2 | 2,434726 | 0,0009638356 | 0,0979272527 | UP   |
| M967T12_2 | -0,49916 | 0,0010067352 | 0,0995787243 | DOWN |
| M796T12   | 3,512163 | 0,0010166677 | 0,0999487003 | UP   |
| M716T3_1  | 7,521069 | 0,0010671636 | 0,1017620240 | UP   |
| M193T2_5  | 1,832402 | 0,0010983885 | 0,1028298097 | UP   |
| M381T3_1  | 2,617175 | 0,0011088051 | 0,1031774147 | UP   |
| M795T17   | -0,22502 | 0,0011439963 | 0,1043212882 | DOWN |
| M947T17   | 0,469948 | 0,0011724774 | 0,1052140571 | UP   |
| M393T3_1  | 1,760585 | 0,0011982197 | 0,1059968361 | UP   |
| M674T2_1  | 3,837176 | 0,0012079740 | 0,1062876710 | UP   |
| M295T16_2 | 0,204862 | 0,0012460797 | 0,1073945952 | UP   |
| M204T2_2  | 2,444993 | 0,0012866918 | 0,1085254705 | UP   |
| M719T2_1  | 1,92518  | 0,0012929615 | 0,1086957643 | UP   |
| M674T3    | 5,621679 | 0,0013248529 | 0,1095449257 | UP   |
| M281T15_3 | 0,271291 | 0,0013389088 | 0,1099103849 | UP   |
| M241T2_1  | 2,192567 | 0,0014527006 | 0,1126859950 | UP   |
| M295T2_3  | 1,78968  | 0,0014796026 | 0,1132980944 | UP   |
| M255T12_3 | 2,909412 | 0,0015098946 | 0,1139687670 | UP   |
| M447T14_1 | -0,30821 | 0,0015181785 | 0,1141488559 | DOWN |
| M205T10   | -1,44697 | 0,0015468719 | 0,1147619700 | DOWN |
| M419T13_1 | -0,31748 | 0,0015678618 | 0,1152002630 | DOWN |
| M398T18   | -0,44447 | 0,0015916508 | 0,1156869222 | DOWN |
| M185T13_2 | 0,340109 | 0,0016547523 | 0,1169283711 | UP   |
| M860T12_2 | 0,938309 | 0,0016831391 | 0,1174646080 | UP   |
| M523T2_1  | 2,286102 | 0,0016984184 | 0,1177477885 | UP   |
| M526T11   | 3,610576 | 0,0017357487 | 0,1184241661 | UP   |
| M363T2_2  | 1,433716 | 0,0017676376 | 0,1189851611 | UP   |
| M591T2_4  | 2,620412 | 0,0018010928 | 0,1195577863 | UP   |
| M231T12_1 | 2,378323 | 0,0018580896 | 0,1204976610 | UP   |
| M904T12   | -0,42065 | 0,0018581764 | 0,1204990597 | DOWN |
| M189T2_2  | 2,205857 | 0,0018705154 | 0,1206968381 | UP   |
| M517T18   | -0,41017 | 0,0019914079 | 0,1225354985 | DOWN |
| M256T2_2  | 1,919668 | 0,0020627193 | 0,1235422028 | UP   |
| M312T3    | 10,28737 | 0,0020708222 | 0,1236532076 | UP   |
| M791T12_3 | 4,30506  | 0,0020710273 | 0,1236560094 | UP   |
| M307T2_5  | 1,727217 | 0,0020964236 | 0,1239995716 | UP   |
| M365T14_2 | 1,372887 | 0,0020964307 | 0,1239996670 | UP   |
| M300T13_1 | 2,091415 | 0,0021176180 | 0,1242814021 | UP   |
| M351T15_1 | -0,67633 | 0,0021478644 | 0,1246761090 | DOWN |

|           |          |              |              |      |
|-----------|----------|--------------|--------------|------|
| M714T20   | 0,443243 | 0,0021747280 | 0,1250194922 | UP   |
| M905T12_3 | -0,42023 | 0,0022676893 | 0,1261583601 | DOWN |
| M275T2_9  | 1,255795 | 0,0022942716 | 0,1264706347 | UP   |
| M697T2_3  | 2,304006 | 0,0022948854 | 0,1264777769 | UP   |
| M247T2_2  | 2,433325 | 0,0022986440 | 0,1265214529 | UP   |
| M630T2_3  | 3,111297 | 0,0023559425 | 0,1271735819 | UP   |
| M237T2_1  | 1,946404 | 0,0023644453 | 0,1272682174 | UP   |
| M651T16   | -0,6788  | 0,0023732785 | 0,1273659593 | DOWN |
| M831T14   | -0,33946 | 0,0023858567 | 0,1275041468 | DOWN |
| M741T20   | 0,703275 | 0,0024176632 | 0,1278484655 | UP   |
| M816T20   | 0,771119 | 0,0024338206 | 0,1280206245 | UP   |
| M135T3_1  | 1,682389 | 0,0024381909 | 0,1280668776 | UP   |
| M233T3    | 2,922771 | 0,0024436836 | 0,1281248207 | UP   |
